# Supplementary material
Source: ML conference proceedings conference paper supplement (https://openaccess.thecvf.com/content/CVPR2026/html/Xie_RAYNOVA_Scale-Temporal_Autoregressive_CVPR_2026_paper.html)
Supplement: Supplementary file 1 [file Xie_RAYNOVA_Scale-Temporal_Autoregressive_CVPR_2026_supplemental.pdf]

Table 8. Ablation Study on Spatio-Temporal Module.

| S.-T. Module | FID↓        | FVD↓      |
|--------------|-------------|-----------|
| decoupled    | 15.6        | 140       |
| global       | <b>10.5</b> | <b>91</b> |

Table 9. Ablation Study on Random Errors in Training.

| Random Errors | FID↓        | FVD↓       |
|---------------|-------------|------------|
| ✗             | 19.8        | 142        |
| ✓             | <b>17.2</b> | <b>124</b> |

In this supplementary material, we present additional implementation details and results that could not be included in the main paper due to space constraints. In Sec. 6, we provide further details on the model architecture and training procedure. In Sec. 7, we report additional ablation studies to support our design choices. In Sec. 8, we include more qualitative results. Finally, we discuss the limitations of our work in Sec. 9.

## 6. Implementation Details

As mentioned in Sec. 4.1, RAYNOVA model is initialized from the pretrained weights of Infinity [21]. Although video VAEs [43, 78] are widely recognized for improving temporal coherence and yielding better FVD scores, we instead directly adopt the multi-scale image tokenizer used in Infinity [21] to better accommodate drastic camera motions and varying frame rates.

RAYNOVA includes two model variants with approximately 130M and 2B parameters. Unless otherwise specified, all experiments use the 2B model. The 130M model is only used in several ablation studies, including Tab. 6, Fig. 5, and Tab. 9.

The training of RAYNOVA includes three stages as follows. In the first stage, we first train the model on short multi-view video clips containing 4 frames at a resolution of  $192 \times 336$ . The frame intervals are independently sampled between 0.1s and 1s. We use a batch size of 64 and a learning rate of  $5e-5$ , and train for 4k iterations. In the second stage, we then train the model on the same short clips but at a higher resolution of  $384 \times 672$ . The batch size is reduced to 32, and the learning rate is decreased to  $2.5e-5$ . This stage also runs for 4k iterations. In the last stage, we adopt the recurrent training scheme described in Alg. 1. The model is trained on long multi-view image sequences with 20 frames at  $384 \times 672$  resolution. We use a batch size of 32 and a learning rate of  $2.5e-6$  for 300 iterations. All training is conducted on 32 NVIDIA A100 GPUs using the AdamW optimizer [37].

## 7. Additional Ablation Study

**Global Causal Attention.** In Sec. 3.4, we introduce a global self-attention module within the dual-causal block that jointly attends over all cameras and frames to ensure spatio-temporal consistency. Following prior work [14, 70, 71], we also experiment with an alternative decoupled design that applies two sequential self-attention modules: one for cross-view interactions per frame and one for cross-frame interactions per camera. As shown in Tab. 8, the global attention module significantly outperforms the decoupled spatio-temporal design. The decoupled approach implicitly assumes strong temporal correlation across frames captured by the same camera, thereby injecting strong ego-motion priors. In contrast, the global attention module incorporates minimal inductive bias and therefore generalizes better.

**Random Errors in Training.** RAYNOVA inherits the teacher-forcing autoregressive training scheme used in VAR [58] and Infinity [21], which can lead to error propagation due to the mismatch between training and inference. To mitigate this issue, we follow the idea introduced in Infinity [21] and inject random errors into the bit-wise multi-scale tokens  $X_k$  across all three training stages by randomly flipping a portion of bits in each token. As shown in Tab. 9, this simple strategy improves video generation quality by narrowing the gap between training and inference.

## 8. Additional Qualitative Results

**Zero-Shot to Novel Camera Configurations.** The ray-level relative position embedding enables RAYNOVA to generalize to unseen camera configurations. In Fig. 6, we generate multi-view videos under the camera setup of the Waymo Open Dataset [56], which is never seen during training. Nevertheless, RAYNOVA is able to synthesize multi-view videos with reasonable visual quality and temporal coherence.

**Camera Rotation & Shifting.** In Fig. 7, RAYNOVA is able to simulate camera rotations and translations. This highlights another advantage of our ray-level position embedding: it enables RAYNOVA to effectively function as a feed-forward novel view synthesis model.

**Multi-View Video Generation.** In Fig. 8 and Fig. 9, we present additional examples of multi-view video generation across diverse camera configurations and environments. We also provide several synthetic multi-view videos on our [website](#) with object and map input conditions. RAYNOVA demonstrates strong condition fidelity and high visual realism.

## 9. Limitation and Future Work

Our current training data are limited to driving scenarios, which constrains the generalization ability of RAYNOVA in non-driving environments. In future work, we plan to incorporate more diverse datasets (*e.g.*, robotics or UAV) into the training pipeline. In addition, our evaluation primarily focuses on multi-view video generation. We aim to explore broader applications of RAYNOVA, such as closed-loop simulation for end-to-end driving models [26, 74]. Recent advances in visual autoregressive models [18, 62] can also be readily integrated into the RAYNOVA framework to further enhance its capability and efficiency.

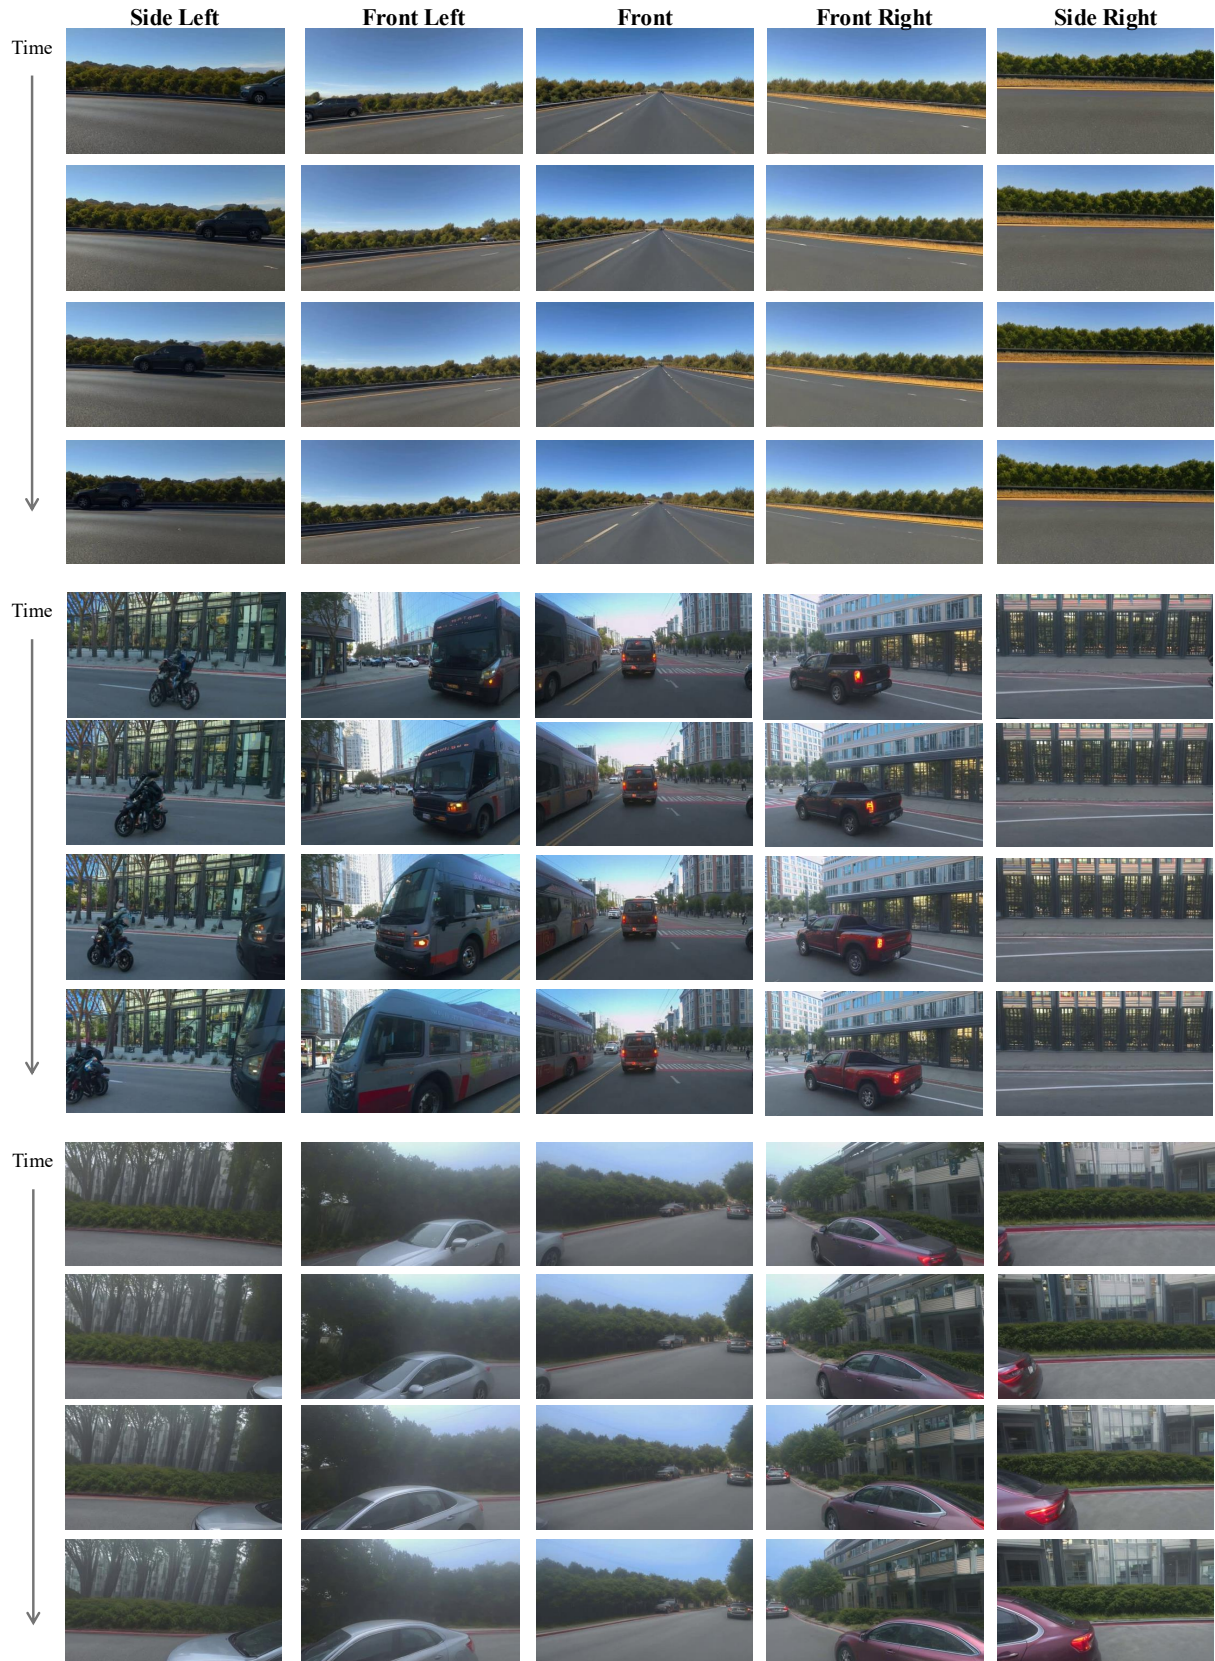

Figure 6. Zero-Shot to Unseen Waymo Open Dataset Camera Configuration.

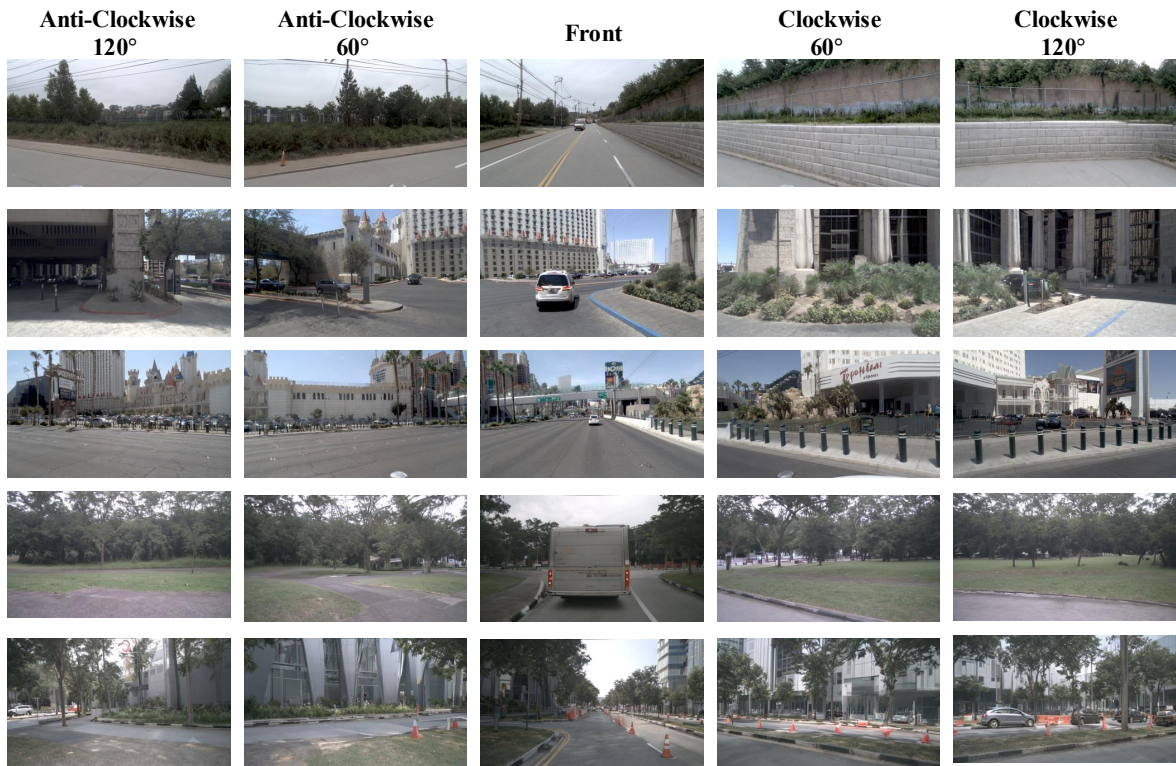

(a) Camera Rotation.

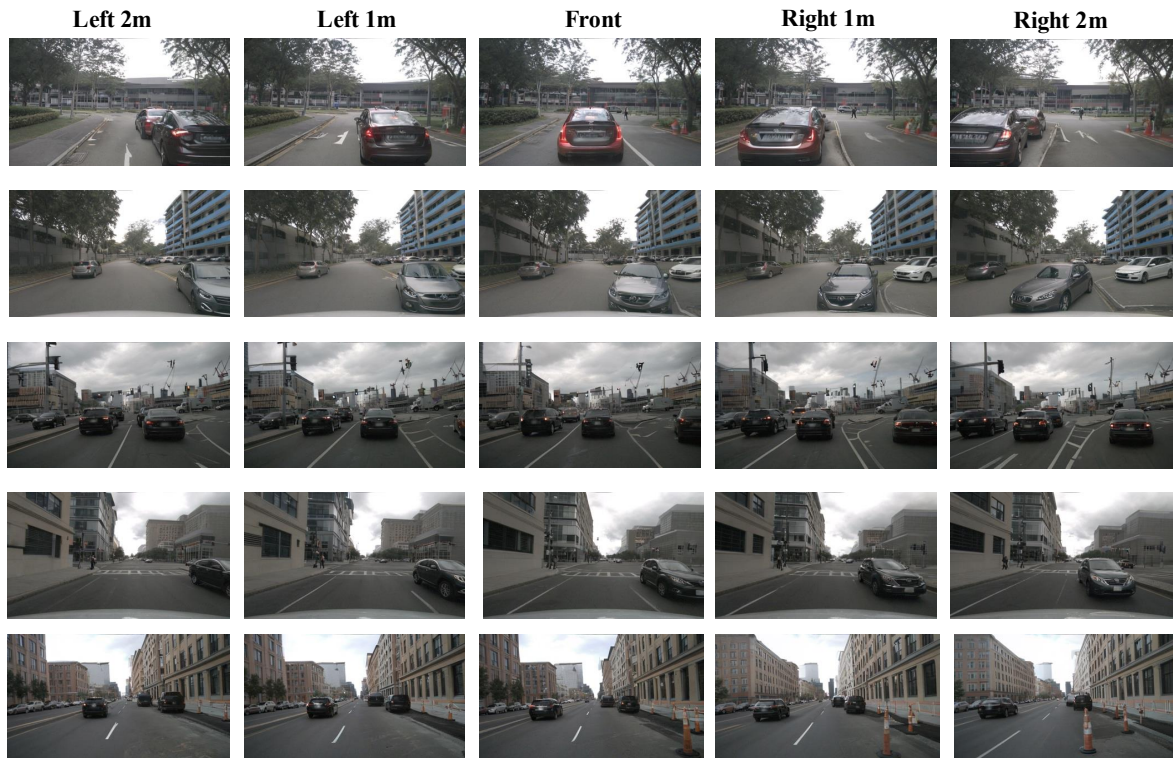

(b) Camera Shifting.

Figure 7. Novel View Synthesis with Camera Rotation and Shifting.

Time

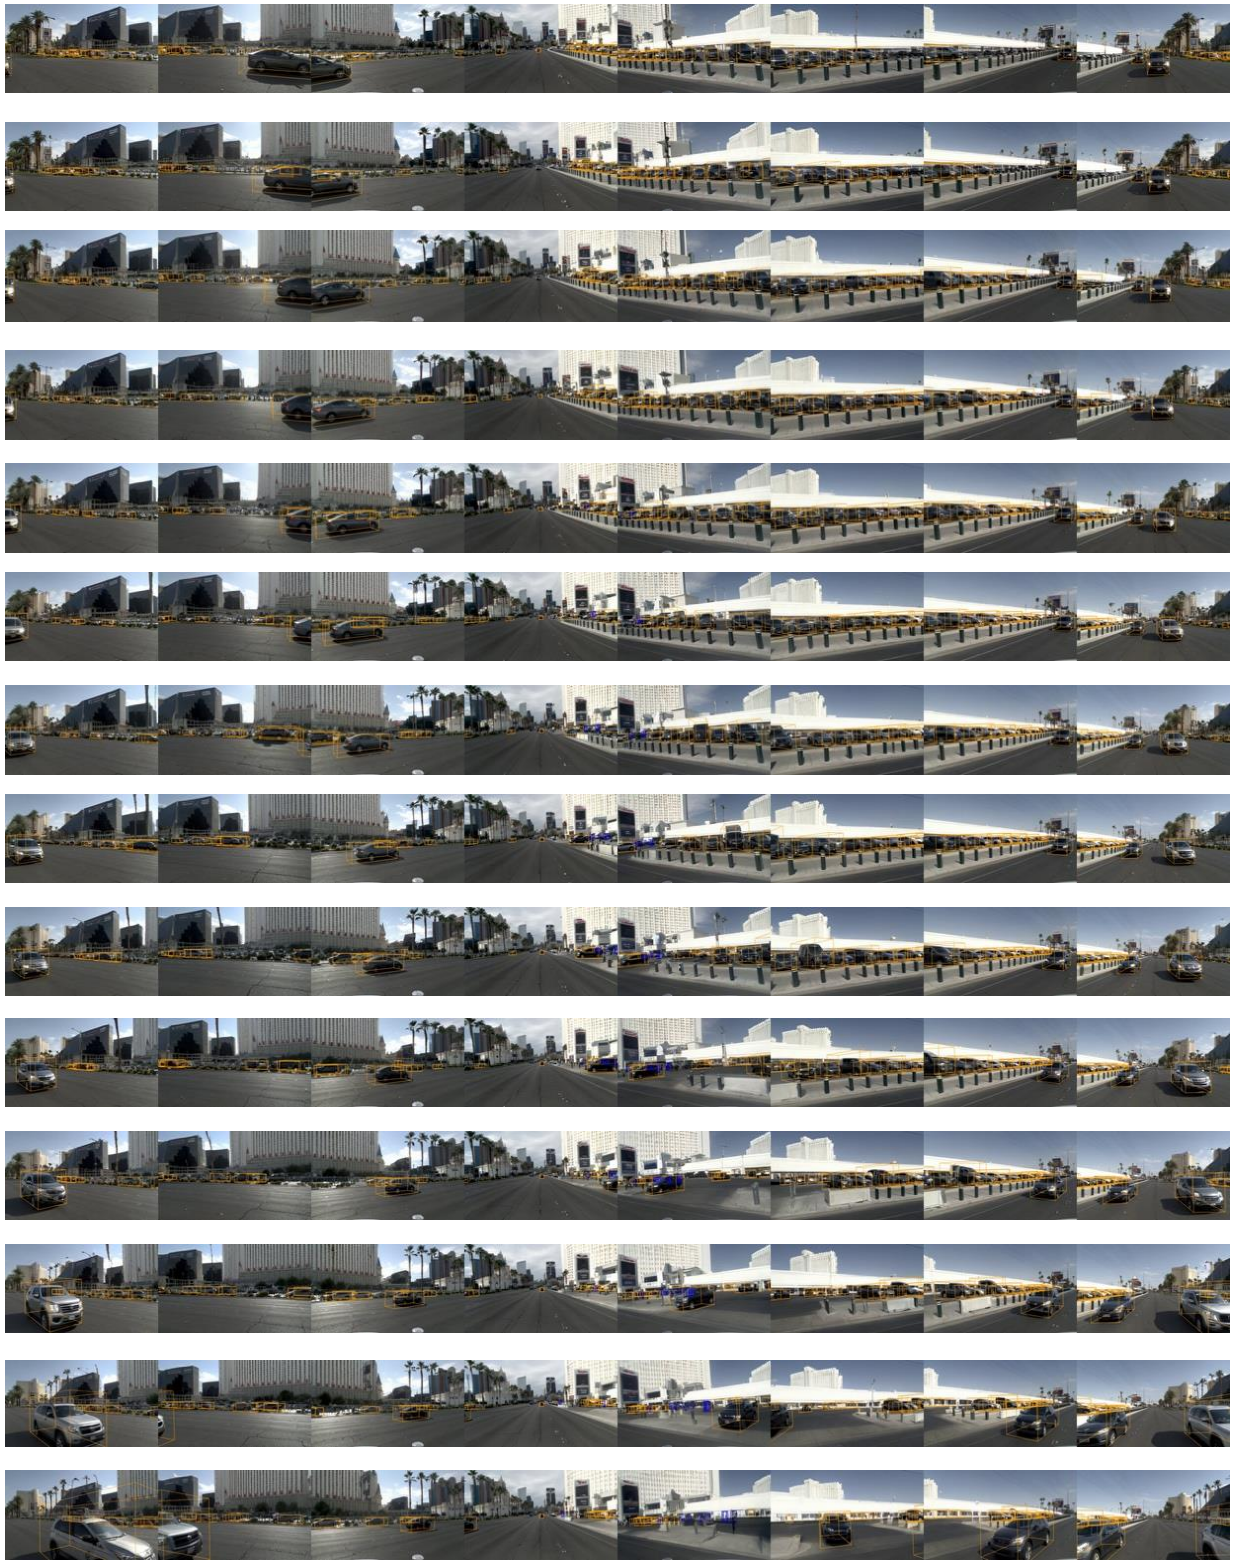

Figure 8. Multi-View Video Generation with Eight Cameras.

Time

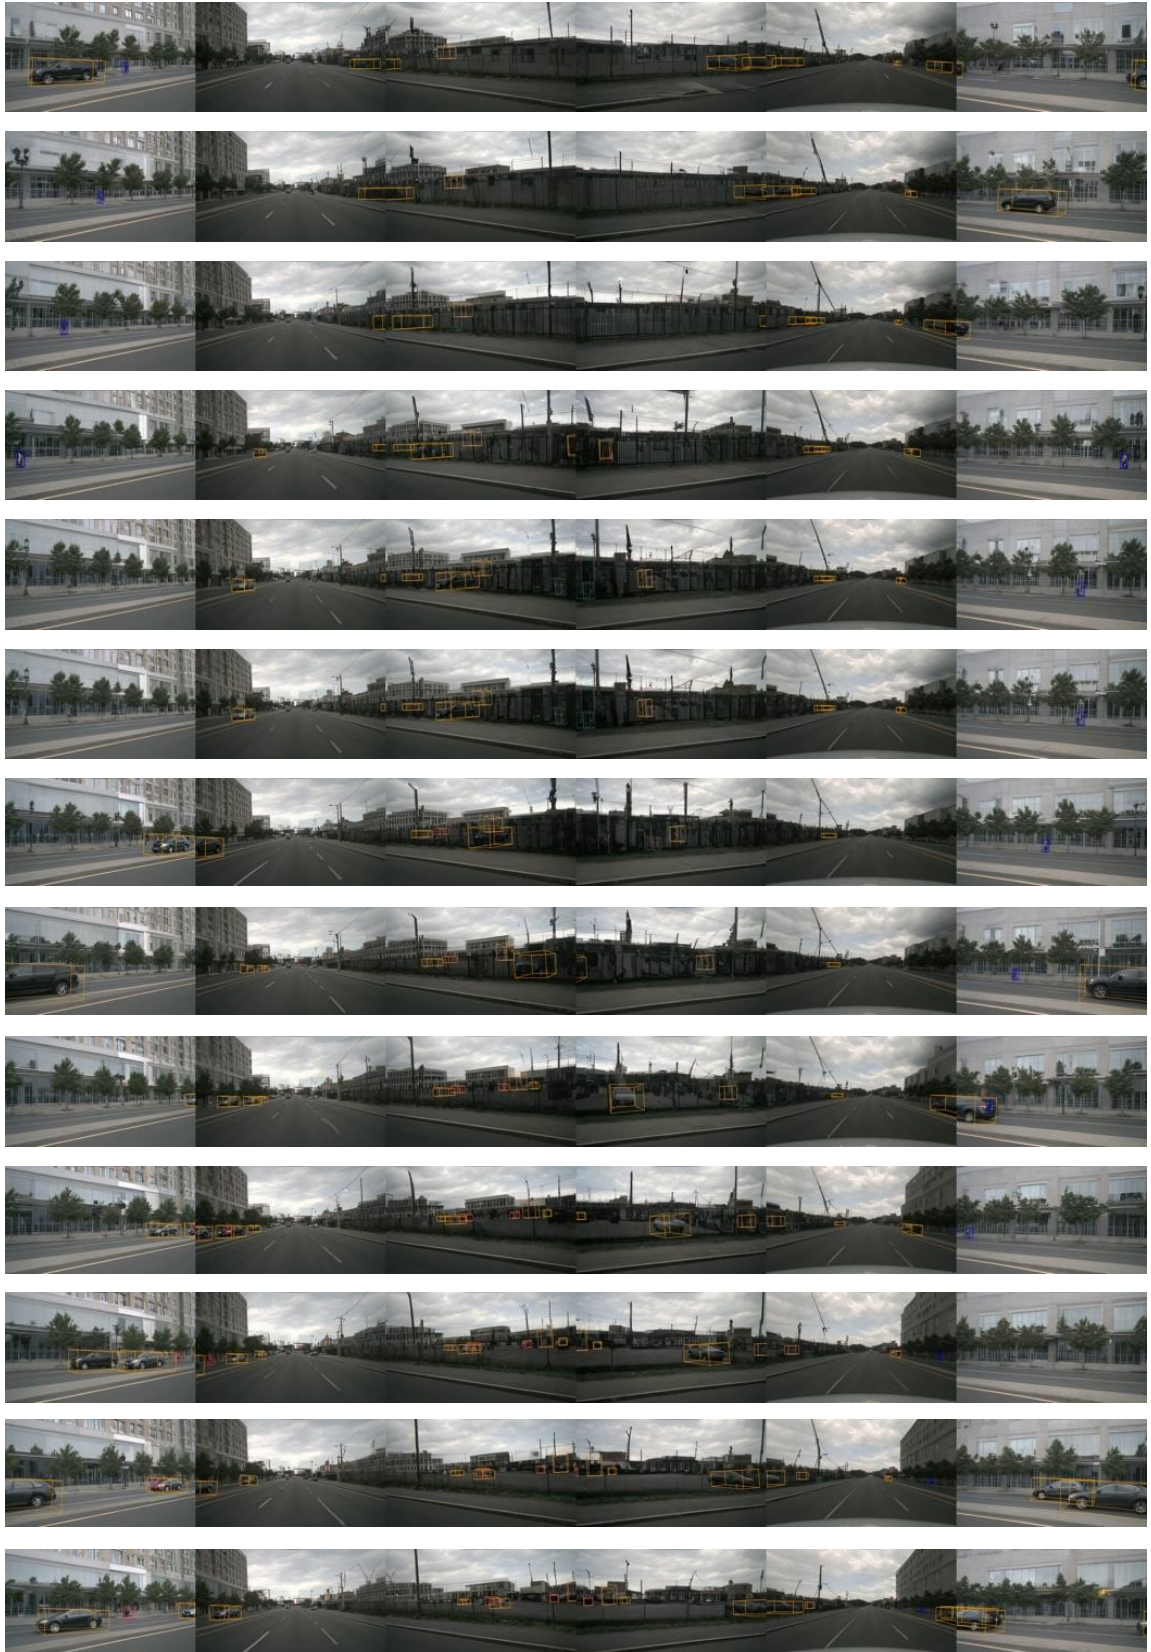

Figure 9. Multi-View Video Generation with Six Cameras.

## References

- [1] Niket Agarwal, Arslan Ali, Maciej Bala, Yogesh Balaji, Erik Barker, Tiffany Cai, Prithvijit Chattopadhyay, Yongxin Chen, Yin Cui, Yifan Ding, et al. Cosmos world foundation model platform for physical ai. *arXiv preprint arXiv:2501.03575*, 2025. 3
- [2] Andreas Blattmann, Tim Dockhorn, Sumith Kulal, Daniel Mendelevitch, Maciej Kilian, Dominik Lorenz, Yam Levi, Zion English, Vikram Voleti, Adam Letts, et al. Stable video diffusion: Scaling latent video diffusion models to large datasets. *arXiv preprint arXiv:2311.15127*, 2023. 3
- [3] Tim Brooks, Bill Peebles, Connor Holmes, Will DePue, Yufei Guo, Li Jing, David Schnurr, Joe Taylor, Troy Luhman, Eric Luhman, et al. Video generation models as world simulators. *OpenAI Blog*, 1(8):1, 2024. 1
- [4] Jake Bruce, Michael D Dennis, Ashley Edwards, Jack Parker-Holder, Yuge Shi, Edward Hughes, Matthew Lai, Aditi Mavalankar, Richie Steigerwald, Chris Apps, et al. Genie: Generative interactive environments. In *Forty-first International Conference on Machine Learning*, 2024. 1
- [5] Holger Caesar, Varun Bankiti, Alex H Lang, Sourabh Vora, Venice Erin Liong, Qiang Xu, Anush Krishnan, Yu Pan, Giancarlo Baldan, and Oscar Beijbom. nuscenes: A multi-modal dataset for autonomous driving. In *Proceedings of the IEEE/CVF conference on computer vision and pattern recognition*, pages 11621–11631, 2020. 6
- [6] Holger Caesar, Juraj Kabzan, Kok Seang Tan, Whye Kit Fong, Eric Wolff, Alex Lang, Luke Fletcher, Oscar Beijbom, and Sammy Omari. Nuplan: A closed-loop ml-based planning benchmark for autonomous vehicles, 2022. 6
- [7] Anthony Chen, Wenzhao Zheng, Yida Wang, Xueyang Zhang, Kun Zhan, Peng Jia, Kurt Keutzer, and Shanghang Zhang. Geodrive: 3d geometry-informed driving world model with precise action control. *arXiv preprint arXiv:2505.22421*, 2025. 2
- [8] Rui Chen, Zehuan Wu, Yichen Liu, Yuxin Guo, Jingcheng Ni, Haifeng Xia, and Siyu Xia. Unimlvg: Unified framework for multi-view long video generation with comprehensive control capabilities for autonomous driving. *arXiv preprint arXiv:2412.04842*, 2024. 5
- [9] Ziyu Chen, Jiawei Yang, Jiahui Huang, Riccardo de Lutio, Janick Martinez Esturo, Boris Ivanovic, Or Litany, Zan Gojcic, Sanja Fidler, Marco Pavone, et al. Omnire: Omni urban scene reconstruction. *arXiv preprint arXiv:2408.16760*, 2024. 8
- [10] Ziyu Chen, Jiawei Yang, Jiahui Huang, Riccardo de Lutio, Janick Martinez Esturo, Boris Ivanovic, Or Litany, Zan Gojcic, Sanja Fidler, Marco Pavone, Li Song, and Yue Wang. Omnire: Omni urban scene reconstruction, 2025. 3
- [11] Zihang Dai, Zhilin Yang, Yiming Yang, Jaime Carbonell, Quoc V Le, and Ruslan Salakhutdinov. Transformer-xl: Attentive language models beyond a fixed-length context. *arXiv preprint arXiv:1901.02860*, 2019. 6
- [12] Tianchen Deng, Xuefeng Chen, Yi Chen, Qu Chen, Yuyao Xu, Lijin Yang, Le Xu, Yu Zhang, Bo Zhang, Wuxiong Huang, et al. Gaussiandwm: 3d gaussian driving world model for unified scene understanding and multi-modal generation. *arXiv preprint arXiv:2512.23180*, 2025. 3
- [13] Tianchen Deng, Yue Pan, Shenghai Yuan, Dong Li, Chen Wang, Mingrui Li, Long Chen, Lihua Xie, Danwei Wang, Jingchuan Wang, et al. What is the best 3d scene representation for robotics? from geometric to foundation models. *arXiv preprint arXiv:2512.03422*, 2025. 3
- [14] Ruiyuan Gao, Kai Chen, Enze Xie, Lanqing Hong, Zhenguo Li, Dit-Yan Yeung, and Qiang Xu. Magicdrive: Street view generation with diverse 3d geometry control. *arXiv preprint arXiv:2310.02601*, 2023. 1, 3, 7, 13
- [15] Ruiyuan Gao, Kai Chen, Zhihao Li, Lanqing Hong, Zhenguo Li, and Qiang Xu. Magicdrive3d: Controllable 3d generation for any-view rendering in street scenes. *arXiv preprint arXiv:2405.14475*, 2024. 3
- [16] Songwei Ge, Thomas Hayes, Harry Yang, Xi Yin, Guan Pang, David Jacobs, Jia-Bin Huang, and Devi Parikh. Long video generation with time-agnostic vqgan and time-sensitive transformer. *ECCV*, 2022. 3
- [17] Songwei Ge, Seungjun Nah, Guilin Liu, Tyler Poon, Andrew Tao, Bryan Catanzaro, David Jacobs, Jia-Bin Huang, Ming-Yu Liu, and Yogesh Balaji. Preserve your own correlation: A noise prior for video diffusion models, 2024. 3
- [18] Hang Guo, Yawei Li, Taolin Zhang, Jiangshan Wang, Tao Dai, Shu-Tao Xia, and Luca Benini. Fastvar: Linear visual autoregressive modeling via cached token pruning. *arXiv preprint arXiv:2503.23367*, 2025. 3, 14
- [19] Jiazhe Guo, Yikang Ding, Xiwu Chen, Shuo Chen, Bohan Li, Yingshuang Zou, Xiaoyang Lyu, Feiyang Tan, Xiaojuan Qi, Zhiheng Li, and Hao Zhao. Dist-4d: Disentangled spatiotemporal diffusion with metric depth for 4d driving scene generation, 2025. 1, 2
- [20] David Ha and Jürgen Schmidhuber. World models. *arXiv preprint arXiv:1803.10122*, 2018. 1
- [21] Jian Han, Jinlai Liu, Yi Jiang, Bin Yan, Yuqi Zhang, Zehuan Yuan, Bingyue Peng, and Xiaobing Liu. Infinity: Scaling bit-wise autoregressive modeling for high-resolution image synthesis. *arXiv preprint arXiv:2412.04431*, 2024. 1, 3, 5, 6, 13
- [22] Byeongho Heo, Song Park, Dongyoon Han, and Sangdoon Yun. Rotary position embedding for vision transformer. In *European Conference on Computer Vision*, pages 289–305. Springer, 2024. 5, 6
- [23] Martin Heusel, Hubert Ramsauer, Thomas Unterthiner, Bernhard Nessler, and Sepp Hochreiter. Gans trained by a two time-scale update rule converge to a local nash equilibrium, 2017. 6
- [24] Yicong Hong, Kai Zhang, Jiuxiang Gu, Sai Bi, Yang Zhou, Difan Liu, Feng Liu, Kalyan Sunkavalli, Trung Bui, and Hao Tan. Lrm: Large reconstruction model for single image to 3d. *arXiv preprint arXiv:2311.04400*, 2023. 3
- [25] Anthony Hu, Lloyd Russell, Hudson Yeo, Zak Murez, George Fedoseev, Alex Kendall, Jamie Shotton, and Gianluca Corrado. Gaia-1: A generative world model for autonomous driving, 2023. 3
- [26] Jyh-Jing Hwang, Runsheng Xu, Hubert Lin, Wei-Chih Hung, Jingwei Ji, Kristy Choi, Di Huang, Tong He, Paul Covington,

- Benjamin Sapp, et al. Emma: End-to-end multimodal model for autonomous driving. *arXiv preprint arXiv:2410.23262*, 2024. 14
- [27] Bo et al. Jiang. Vad: Vectorized scene representation for efficient autonomous driving. In *ICCV*, 2023. 7
- [28] Hanwen Jiang, Hao Tan, Peng Wang, Haian Jin, Yue Zhao, Sai Bi, Kai Zhang, Fujun Luan, Kalyan Sunkavalli, Qixing Huang, et al. Rayzer: A self-supervised large view synthesis model. *arXiv preprint arXiv:2505.00702*, 2025. 3
- [29] Haian Jin, Hanwen Jiang, Hao Tan, Kai Zhang, Sai Bi, Tianyuan Zhang, Fujun Luan, Noah Snively, and Zexiang Xu. Lvsm: A large view synthesis model with minimal 3d inductive bias. *arXiv preprint arXiv:2410.17242*, 2024. 3, 5
- [30] Bernhard Kerbl, Georgios Kopanas, Thomas Leimkühler, and George Drettakis. 3d gaussian splatting for real-time radiance field rendering. *ACM Trans. Graph.*, 42(4):139–1, 2023. 3
- [31] Yann LeCun. A path towards autonomous machine intelligence version 0.9. 2, 2022-06-27. *Open Review*, 62(1):1–62, 2022. 1
- [32] Doyup Lee, Chiheon Kim, Saehoon Kim, Minsu Cho, and Wook-Shin Han. Autoregressive image generation using residual quantization. In *Proceedings of the IEEE/CVF Conference on Computer Vision and Pattern Recognition*, pages 11523–11532, 2022. 3
- [33] Quanyi Li, Zhenghao Mark Peng, Lan Feng, Zhizheng Liu, Chenda Duan, Wenjie Mo, and Bolei Zhou. Scenarionet: Open-source platform for large-scale traffic scenario simulation and modeling. *Advances in neural information processing systems*, 36:3894–3920, 2023. 6
- [34] Xiaofan Li, Yifu Zhang, and Xiaoqing Ye. Drivingdiffusion: Layout-guided multi-view driving scenarios video generation with latent diffusion model. In *European Conference on Computer Vision*, pages 469–485. Springer, 2024. 7
- [35] Chang Liu, Rui Li, Kaidong Zhang, Yunwei Lan, and Dong Liu. Stablev2v: Stabilizing shape consistency in video-to-video editing, 2024. 3
- [36] Zhijian Liu, Haotian Tang, Alexander Amini, Xinyu Yang, Huizi Mao, Daniela Rus, and Song Han. Bevfusion: Multi-task multi-sensor fusion with unified bird’s-eye view representation. *arXiv preprint arXiv:2205.13542*, 2022. 7
- [37] Ilya Loshchilov and Frank Hutter. Decoupled weight decay regularization. *arXiv preprint arXiv:1711.05101*, 2017. 13
- [38] Jiachen Lu, Ze Huang, Jiahui Zhang, Zeyu Yang, and Li Zhang. Wovogen: World volume-aware diffusion for controllable multi-camera driving scene generation. *arXiv preprint arXiv:2312.02934*, 2023. 1, 3
- [39] Xin Ma, Yaohui Wang, Xinyuan Chen, Gengyun Jia, Ziwei Liu, Yuan-Fang Li, Cunjian Chen, and Yu Qiao. Latte: Latent diffusion transformer for video generation, 2025. 3
- [40] Vincent Micheli, Eloi Alonso, and François Fleuret. Transformers are sample-efficient world models. *ICLR*, 2023. 3
- [41] Ben Mildenhall, Pratul P Srinivasan, Matthew Tancik, Jonathan T Barron, Ravi Ramamoorthi, and Ren Ng. Nerf: Representing scenes as neural radiance fields for view synthesis. *Communications of the ACM*, 65(1):99–106, 2021. 3
- [42] Nvidia. World foundation model. <https://www.nvidia.com/en-us/glossary/world-models/>, 2024. 1
- [43] OpenAI. Sora: Creating video from text, 2024. 1, 3, 13
- [44] Chensheng Peng, Chengwei Zhang, Yixiao Wang, Chenfeng Xu, Yichen Xie, Wenzhao Zheng, Kurt Keutzer, Masayoshi Tomizuka, and Wei Zhan. Desire-gs: 4d street gaussians for static-dynamic decomposition and surface reconstruction for urban driving scenes. *arXiv preprint arXiv:2411.11921*, 2024. 3
- [45] Julius Plucker. Xvii. on a new geometry of space. *Philosophical Transactions of the Royal Society of London*, pages 725–791, 1865. 4
- [46] Adam Polyak, Amit Zohar, Andrew Brown, Andros Tjandra, Animesh Sinha, Ann Lee, Apoorv Vyas, Bowen Shi, Chih-Yao Ma, Ching-Yao Chuang, et al. Movie gen: A cast of media foundation models. *arXiv*, 2024. 3
- [47] Charles R Qi, Hao Su, Kaichun Mo, and Leonidas J Guibas. Pointnet: Deep learning on point sets for 3d classification and segmentation. In *Proceedings of the IEEE conference on computer vision and pattern recognition*, pages 652–660, 2017. 6
- [48] Colin Raffel, Noam Shazeer, Adam Roberts, Katherine Lee, Sharan Narang, Michael Matena, Yanqi Zhou, Wei Li, and Peter J Liu. Exploring the limits of transfer learning with a unified text-to-text transformer. *Journal of machine learning research*, 21(140):1–67, 2020. 5, 6
- [49] Weiming Ren, Huan Yang, Ge Zhang, Cong Wei, Xinrun Du, Wenhao Huang, and Wenhui Chen. Consisti2v: Enhancing visual consistency for image-to-video generation, 2024. 3
- [50] Runway. Introducing gen-3 alpha: A new frontier for video generation. <https://runwayml.com/research/introducing-gen-3-alpha>, 2024. 3
- [51] Lloyd Russell, Anthony Hu, Lorenzo Bertoni, George Fedoseev, Jamie Shotton, Elahe Arani, and Gianluca Corrado. Gaia-2: A controllable multi-view generative world model for autonomous driving. *arXiv preprint arXiv:2503.20523*, 2025. 5
- [52] Lloyd Russell, Anthony Hu, Lorenzo Bertoni, George Fedoseev, Jamie Shotton, Elahe Arani, and Gianluca Corrado. Gaia-2: A controllable multi-view generative world model for autonomous driving, 2025. 1, 4
- [53] Mehdi SM Sajjadi, Daniel Duckworth, Aravindh Mahendran, Sjoerd Van Steenkiste, Filip Pavetic, Mario Lucic, Leonidas J Guibas, Klaus Greff, and Thomas Kipf. Object scene representation transformer. *Advances in neural information processing systems*, 35:9512–9524, 2022. 3
- [54] Mohammad Shoeybi, Mostofa Patwary, Raul Puri, Patrick LeGresley, Jared Casper, and Bryan Catanzaro. Megatron-lm: Training multi-billion parameter language models using model parallelism. *arXiv preprint arXiv:1909.08053*, 2019. 6
- [55] Jianlin Su, Murtadha Ahmed, Yu Lu, Shengfeng Pan, Wen Bo, and Yunfeng Liu. Roformer: Enhanced transformer with rotary position embedding. *Neurocomputing*, 568:127063, 2024. 4, 5, 6
- [56] Pei Sun, Henrik Kretzschmar, Xerxes Dotiwalla, Aurelien Chouard, Vijaysai Patnaik, Paul Tsui, James Guo, Yin Zhou,

- Yuning Chai, Benjamin Caine, et al. Scalability in perception for autonomous driving: Waymo open dataset. In *Proceedings of the IEEE/CVF conference on computer vision and pattern recognition*, pages 2446–2454, 2020. 13
- [57] OpenAI Team. Gpt-4o mini: advancing costefficient intelligence, 2024. 6
- [58] Keyu Tian, Yi Jiang, Zehuan Yuan, Bingyue Peng, and Liwei Wang. Visual autoregressive modeling: Scalable image generation via next-scale prediction. *Advances in neural information processing systems*, 37:84839–84865, 2024. 1, 3, 13
- [59] Thomas Unterthiner, Sjoerd Van Steenkiste, Karol Kurach, Raphael Marinier, Marcin Michalski, and Sylvain Gelly. Towards accurate generative models of video: A new metric & challenges. *arXiv preprint arXiv:1812.01717*, 2018. 6
- [60] Ashish Vaswani, Noam Shazeer, Niki Parmar, Jakob Uszkoreit, Llion Jones, Aidan N Gomez, Lukasz Kaiser, and Illia Polosukhin. Attention is all you need. *Advances in neural information processing systems*, 30, 2017. 5
- [61] Ruben Villegas, Mohammad Babaeizadeh, Pieter-Jan Kindermans, Hernan Moraldo, Han Zhang, Mohammad Taghi Saffar, Santiago Castro, Julius Kunze, and Dumitru Erhan. Phenaki: Variable length video generation from open domain textual description. In *ICLR*, 2023. 3
- [62] Anton Voronov, Denis Kuznedelev, Mikhail Khoroshikh, Valentin Khrulkov, and Dmitry Baranchuk. Switti: Designing scale-wise transformers for text-to-image synthesis. *arXiv preprint arXiv:2412.01819*, 2024. 14
- [63] Qitai Wang, Lue Fan, Yuqi Wang, Yuntao Chen, and Zhaoxiang Zhang. Freevs: Generative view synthesis on free driving trajectory. *arXiv preprint arXiv:2410.18079*, 2024. 7, 8
- [64] Shihao Wang, Yingfei Liu, Tiancai Wang, Ying Li, and Xiangyu Zhang. Exploring object-centric temporal modeling for efficient multi-view 3d object detection. In *Proceedings of the IEEE/CVF international conference on computer vision*, pages 3621–3631, 2023. 7
- [65] Shihao Wang, Zhiding Yu, Xiaohui Jiang, Shiyi Lan, Min Shi, Nadine Chang, Jan Kautz, Ying Li, and Jose M Alvarez. Omnidrive: A holistic vision-language dataset for autonomous driving with counterfactual reasoning. In *Proceedings of the Computer Vision and Pattern Recognition Conference*, pages 22442–22452, 2025. 6
- [66] Xiaofeng Wang, Zheng Zhu, Guan Huang, Xinze Chen, and Jiwen Lu. Drivedreamer: Towards real-world-driven world models for autonomous driving. *arXiv preprint arXiv:2309.09777*, 2023. 3, 7
- [67] Xiaofeng Wang, Zheng Zhu, Guan Huang, Xinze Chen, Jiayang Zhu, and Jiwen Lu. Drivedreamer: Towards real-world-driven world models for autonomous driving, 2023. 3
- [68] Xiang Wang, Shiwei Zhang, Changxin Gao, Jiayu Wang, Xiaoqiang Zhou, Yingya Zhang, Luxin Yan, and Nong Sang. Unimate: Taming unified video diffusion models for consistent human image animation, 2024. 3
- [69] Yuqi Wang, Jiawei He, Lue Fan, Hongxin Li, Yuntao Chen, and Zhaoxiang Zhang. Driving into the future: Multiview visual forecasting and planning with world model for autonomous driving, 2023. 3
- [70] Yuqi Wang, Jiawei He, Lue Fan, Hongxin Li, Yuntao Chen, and Zhaoxiang Zhang. Driving into the future: Multiview visual forecasting and planning with world model for autonomous driving. In *Proceedings of the IEEE/CVF Conference on Computer Vision and Pattern Recognition*, pages 14749–14759, 2024. 1, 5, 13
- [71] Yuqing Wen, Yucheng Zhao, Yingfei Liu, Fan Jia, Yanhui Wang, Chong Luo, Chi Zhang, Tiancai Wang, Xiaoyan Sun, and Xiangyu Zhang. Panacea: Panoramic and controllable video generation for autonomous driving. In *Proceedings of the IEEE/CVF Conference on Computer Vision and Pattern Recognition*, pages 6902–6912, 2024. 1, 3, 4, 5, 7, 13
- [72] Yichen Xie, Chenfeng Xu, Marie-Julie Rakotosaona, Patrick Rim, Federico Tombari, Kurt Keutzer, Masayoshi Tomizuka, and Wei Zhan. Sparsefusion: Fusing multi-modal sparse representations for multi-sensor 3d object detection. In *Proceedings of the IEEE/CVF International Conference on Computer Vision*, pages 17591–17602, 2023. 7
- [73] Yichen Xie, Chenfeng Xu, Chensheng Peng, Shuqi Zhao, Nhat Ho, Alexander T Pham, Mingyu Ding, Masayoshi Tomizuka, and Wei Zhan. X-drive: Cross-modality consistent multi-sensor data synthesis for driving scenarios. *arXiv preprint arXiv:2411.01123*, 2024. 1, 3, 7
- [74] Yichen Xie, Runsheng Xu, Tong He, Jyh-Jing Hwang, Katie Luo, Jingwei Ji, Hubert Lin, Letian Chen, Yiren Lu, Zhaoqi Leng, et al. S4-driver: Scalable self-supervised driving multimodal large language model with spatio-temporal visual representation. In *Proceedings of the Computer Vision and Pattern Recognition Conference*, pages 1622–1632, 2025. 14
- [75] Wilson Yan, Yunzhi Zhang, Pieter Abbeel, and Aravind Srinivas. VideoGPT: Video generation using vq-vae and transformers. In *arXiv*, 2021. 3
- [76] Yunzhi Yan, Haotong Lin, Chenxu Zhou, Weijie Wang, Haiyang Sun, Kun Zhan, Xianpeng Lang, Xiaowei Zhou, and Sida Peng. Street gaussians: Modeling dynamic urban scenes with gaussian splatting. In *European Conference on Computer Vision*, pages 156–173. Springer, 2024. 8
- [77] Yunzhi Yan, Haotong Lin, Chenxu Zhou, Weijie Wang, Haiyang Sun, Kun Zhan, Xianpeng Lang, Xiaowei Zhou, and Sida Peng. Street gaussians: Modeling dynamic urban scenes with gaussian splatting, 2024. 3
- [78] Zhuoyi Yang, Jiayan Teng, Wendi Zheng, Ming Ding, Shiyu Huang, Jiazheng Xu, Yuanming Yang, Wenyi Hong, Xiaohan Zhang, Guanyu Feng, Da Yin, Yuxuan Zhang, Weihang Wang, Yean Cheng, Bin Xu, Xiaotao Gu, Yuxiao Dong, and Jie Tang. Cogvideox: Text-to-video diffusion models with an expert transformer, 2025. 1, 3, 13
- [79] Jiahui Yu, Xin Li, Jing Yu Koh, Han Zhang, Ruoming Pang, James Qin, Alexander Ku, Yuanzhong Xu, Jason Baldridge, and Yonghui Wu. Vector-quantized image modeling with improved vqgan. *arXiv preprint arXiv:2110.04627*, 2021. 3
- [80] Lijun Yu, Yong Cheng, Kihyuk Sohn, José Lezama, Han Zhang, Huiwen Chang, Alexander G. Hauptmann, Ming-Hsuan Yang, Yuan Hao, Irfan Essa, and Lu Jiang. MAGVIT: Masked Generative Video Transformer. In *CVPR*, 2023. 3
- [81] Lvmin Zhang, Anyi Rao, and Maneesh Agrawala. Adding conditional control to text-to-image diffusion models. In

*Proceedings of the IEEE/CVF International Conference on Computer Vision*, pages 3836–3847, 2023. [6](#)

- [82] Yumeng Zhang, Shi Gong, Kaixin Xiong, Xiaoqing Ye, Xiao Tan, Fan Wang, Jizhou Huang, Hua Wu, and Haifeng Wang. BEVWorld: A multimodal world model for autonomous driving via unified BEV latent space, 2024. [1](#), [3](#), [7](#)
- [83] Xiaoyu Zhou, Zhiwei Lin, Xiaojun Shan, Yongtao Wang, Deqing Sun, and Ming-Hsuan Yang. Drivinggaussian: Composite gaussian splatting for surrounding dynamic autonomous driving scenes, 2024. [3](#)
- [84] Xin Zhou, Dingkang Liang, Sifan Tu, Xiwu Chen, Yikang Ding, Dingyuan Zhang, Feiyang Tan, Hengshuang Zhao, and Xiang Bai. Hermes: A unified self-driving world model for simultaneous 3d scene understanding and generation. *arXiv preprint arXiv:2501.14729*, 2025. [1](#), [3](#)
- [85] Sicheng Zuo, Wenzhao Zheng, Yuanhui Huang, Jie Zhou, and Jiwen Lu. Gaussianworld: Gaussian world model for streaming 3d occupancy prediction. In *Proceedings of the Computer Vision and Pattern Recognition Conference*, pages 6772–6781, 2025. [3](#)
